# Supplementary material
Source: Springer Nature journal article supplement (https://www.springermedizin.de/resource/supplementary/13058_2007_1758_MOESM2_ESM.pdf/9699854)
Supplement: MOESM2 [file 9699854]

**Supplemental table 2 Associations of SNPs with disease characteristics in the ORIGO cohort**

**SNP: rs2981582 in FGFR2**

| Patient or disease characteristics                                                                      |              | n=   | Phenotype per genotype |       |       | p-value<br>3 groups <sup>1</sup> | p-value<br>2 groups <sup>2</sup> |
|---------------------------------------------------------------------------------------------------------|--------------|------|------------------------|-------|-------|----------------------------------|----------------------------------|
|                                                                                                         |              |      | wt/wt                  | wt/mt | mt/mt |                                  |                                  |
| Genotype (number of patients)                                                                           |              |      | 406                    | 645   | 258   |                                  |                                  |
| Age at diagnosis (average)                                                                              |              | 1207 | 53.50                  | 53.92 | 54.66 | 0.466                            | 0.370                            |
| Age groups at diagnosis (%)                                                                             | <40 years    | 1206 | 11.8%                  | 10.2% | 12.3% | 0.758                            | 0.616                            |
|                                                                                                         | 40-50 years  |      | 26.9%                  | 25.4% | 22.6% |                                  |                                  |
|                                                                                                         | 50-60 years  |      | 34.7%                  | 35.1% | 33.6% |                                  |                                  |
|                                                                                                         | >60 years    |      | 26.6%                  | 29.4% | 31.5% |                                  |                                  |
| BMI (average)                                                                                           |              | 1164 | 25.26                  | 25.33 | 25.34 | 0.972                            | 0.810                            |
| Bilateral breast cancer present (%)                                                                     |              | 1218 | 5.9%                   | 6.5%  | 7.1%  | 0.814                            | 0.599                            |
| Stage of primary tumor (%)                                                                              | T0 (in situ) | 1193 | 10.5%                  | 9.0%  | 8.9%  | 0.033                            | 0.363                            |
|                                                                                                         | T1           |      | 56.9%                  | 52.6% | 63.6% |                                  |                                  |
|                                                                                                         | T2           |      | 24.5%                  | 30.5% | 25.0% |                                  |                                  |
|                                                                                                         | T3 or T4     |      | 8.1%                   | 7.9%  | 2.5%  |                                  |                                  |
| Lymph nodes involved (stage N1, N2 or N3) (%)                                                           |              | 1080 | 41.9%                  | 40.9% | 41.0% | 0.955                            | 0.960                            |
| Clinical UICC stage (%)                                                                                 | 1            | 1046 | 45.0%                  | 42.4% | 48.3% | 0.082                            | 0.592                            |
|                                                                                                         | 2            |      | 46.6%                  | 49.1% | 48.8% |                                  |                                  |
|                                                                                                         | 3            |      | 8.4%                   | 8.4%  | 2.9%  |                                  |                                  |
| Bloom-Richardson grade (%)                                                                              | 1            | 928  | 17.2%                  | 19.1% | 19.1% | 0.514                            | 0.340                            |
|                                                                                                         | 2            |      | 39.3%                  | 41.3% | 45.5% |                                  |                                  |
|                                                                                                         | 3            |      | 43.5%                  | 39.6% | 35.4% |                                  |                                  |
| Progesterone receptor positive (%)                                                                      |              | 668  | 61.3%                  | 53.5% | 63.6% | 0.063                            | 0.254                            |
| Estrogen receptor positive (%)                                                                          |              | 804  | 71.5%                  | 71.1% | 75.0% | 0.622                            | 0.831                            |
| Family history positive for breast cancer (%)                                                           |              | 1205 | 36.3%                  | 40.2% | 45.3% | 0.089                            | 0.095                            |
| Family history positive for breast and/or ovarian cancer (%)                                            |              | 1205 | 38.2%                  | 42.0% | 47.9% | 0.065                            | 0.089                            |
| Number of relatives with breast cancer divided by total number of female relatives (average)            |              | 1205 | 0.061                  | 0.066 | 0.082 | 0.062                            | 0.164                            |
| Number of relatives with breast or ovarian cancer divided by total number of female relatives (average) |              | 1205 | 0.067                  | 0.071 | 0.089 | 0.050                            | 0.193                            |
| Number of first degree relatives with breast cancer (average)                                           |              | 1205 | 0.24                   | 0.23  | 0.32  | 0.094                            | 0.611                            |
| Ever pregnant (%)                                                                                       |              | 1134 | 83.5%                  | 81.9% | 82.3% | 0.825                            | 0.544                            |
| Age at first pregnancy (average)                                                                        |              | 927  | 24.72                  | 25.12 | 25.42 | 0.238                            | 0.130                            |
| Total duration of pregnancies (average, in months)                                                      |              | 1168 | 14.68                  | 15.44 | 14.81 | 0.662                            | 0.496                            |
| Breast feeding (%)                                                                                      |              | 1168 | 57.9%                  | 56.2% | 59.1% | 0.713                            | 0.775                            |
| Total duration of breast feeding (average, in months)                                                   |              | 1168 | 4.54                   | 5.51  | 5.83  | 0.224                            | 0.062                            |
| Died during follow-up (%)                                                                               |              | 486  | 16.9%                  | 17.3% | 16.8% | 0.991                            | 0.942                            |

SNP: rs3803662 near TNRC9

| Patient or disease characteristics                                                                      |              | n=   | Phenotype per genotype |       |       | p-value<br>3 groups <sup>1</sup> | p-value<br>2 groups <sup>2</sup> |
|---------------------------------------------------------------------------------------------------------|--------------|------|------------------------|-------|-------|----------------------------------|----------------------------------|
|                                                                                                         |              |      | wt/wt                  | wt/mt | mt/mt |                                  |                                  |
| Genotype (number of patients)                                                                           |              |      | 672                    | 495   | 120   |                                  |                                  |
| Age at diagnosis (average)                                                                              |              | 1184 | 54.30                  | 53.39 | 52.54 | 0.199                            | 0.097                            |
| Age groups at diagnosis (%)                                                                             | <40 years    | 1184 | 11.8%                  | 10.2% | 11.0% | 0.054                            | 0.025                            |
|                                                                                                         | 40-50 years  |      | 23.0%                  | 28.3% | 31.2% |                                  |                                  |
|                                                                                                         | 50-60 years  |      | 33.4%                  | 34.7% | 39.4% |                                  |                                  |
|                                                                                                         | >60 years    |      | 31.7%                  | 26.7% | 18.3% |                                  |                                  |
| BMI (average)                                                                                           |              | 1143 | 25.39                  | 25.20 | 25.06 | 0.680                            | 0.403                            |
| Bilateral breast cancer present (%)                                                                     |              | 1195 | 6.5%                   | 6.4%  | 5.5%  | 0.927                            | 0.848                            |
| Stage of primary tumor (%)                                                                              | T0 (in situ) | 1170 | 7.8%                   | 10.7% | 12.1% | 0.525                            | 0.289                            |
|                                                                                                         | T1           |      | 57.3%                  | 55.3% | 47.7% |                                  |                                  |
|                                                                                                         | T2           |      | 27.3%                  | 27.7% | 32.7% |                                  |                                  |
|                                                                                                         | T3 or T4     |      | 7.6%                   | 6.3%  | 7.4%  |                                  |                                  |
| Lymph nodes involved (stage N1, N2 or N3) (%)                                                           |              | 1060 | 40.3%                  | 43.9% | 36.7% | 0.335                            | 0.468                            |
| Clinical UICC stage (%)                                                                                 | 1            | 1027 | 45.6%                  | 42.1% | 45.2% | 0.781                            | 0.586                            |
|                                                                                                         | 2            |      | 46.7%                  | 50.8% | 46.2% |                                  |                                  |
|                                                                                                         | 3            |      | 7.7%                   | 7.2%  | 8.6%  |                                  |                                  |
| Bloom-Richardson grade (%)                                                                              | 1            | 910  | 17.1%                  | 20.7% | 19.5% | 0.758                            | 0.412                            |
|                                                                                                         | 2            |      | 42.3%                  | 39.7% | 41.5% |                                  |                                  |
|                                                                                                         | 3            |      | 40.6%                  | 39.7% | 39.0% |                                  |                                  |
| Progesterone receptor positive (%)                                                                      |              | 658  | 59.8%                  | 57.4% | 54.0% | 0.678                            | 0.445                            |
| Estrogen receptor positive (%)                                                                          |              | 786  | 72.3%                  | 72.0% | 72.1% | 0.996                            | 0.935                            |
| Family history positive for breast cancer (%)                                                           |              | 1183 | 39.0%                  | 40.3% | 43.5% | 0.656                            | 0.493                            |
| Family history positive for breast and/or ovarian cancer (%)                                            |              | 1183 | 41.2%                  | 42.1% | 44.4% | 0.813                            | 0.642                            |
| Number of relatives with breast cancer divided by total number of female relatives (average)            |              | 1183 | 0.063                  | 0.070 | 0.082 | 0.166                            | 0.118                            |
| Number of relatives with breast or ovarian cancer divided by total number of female relatives (average) |              | 1183 | 0.070                  | 0.075 | 0.086 | 0.362                            | 0.256                            |
| Number of first degree relatives with breast cancer (average)                                           |              | 1183 | 0.23                   | 0.28  | 0.31  | 0.156                            | 0.072                            |
| Ever pregnant (%)                                                                                       |              | 1115 | 80.6%                  | 84.1% | 83.8% | 0.323                            | 0.133                            |
| Age at first pregnancy (average)                                                                        |              | 911  | 25.16                  | 24.95 | 24.98 | 0.788                            | 0.490                            |
| Total duration of pregnancies (average, in months)                                                      |              | 1192 | 14.52                  | 15.93 | 15.22 | 0.237                            | 0.103                            |
| Breast feeding (%)                                                                                      |              | 1147 | 55.4%                  | 61.3% | 58.0% | 0.161                            | 0.070                            |
| Total duration of breast feeding (average, in months)                                                   |              | 1147 | 4.88                   | 5.72  | 6.43  | 0.206                            | 0.097                            |
| Died during follow-up (%)                                                                               |              | 484  | 17.4%                  | 16.9% | 13.2% | 0.760                            | 0.686                            |

SNP: rs12443621 near TNRC9

| Patient or disease characteristics                                                                      |              | n=   | Phenotype per genotype |       |       | p-value<br>3 groups <sup>1</sup> | p-value<br>2 groups <sup>2</sup> |
|---------------------------------------------------------------------------------------------------------|--------------|------|------------------------|-------|-------|----------------------------------|----------------------------------|
|                                                                                                         |              |      | wt/wt                  | wt/mt | mt/mt |                                  |                                  |
| Genotype (number of patients)                                                                           |              |      | 403                    | 688   | 244   |                                  |                                  |
| Age at diagnosis (average)                                                                              |              | 1231 | 54.08                  | 53.81 | 53.45 | 0.800                            | 0.596                            |
| Age groups at diagnosis (%)                                                                             | <40 years    | 1230 | 10.9%                  | 11.0% | 11.4% | 0.625                            | 0.932                            |
|                                                                                                         | 40-50 years  |      | 25.5%                  | 26.3% | 25.0% |                                  |                                  |
|                                                                                                         | 50-60 years  |      | 33.5%                  | 33.0% | 39.5% |                                  |                                  |
|                                                                                                         | >60 years    |      | 30.1%                  | 29.7% | 24.1% |                                  |                                  |
| BMI (average)                                                                                           |              | 1186 | 25.78                  | 25.11 | 25.01 | 0.043                            | 0.015                            |
| Bilateral breast cancer present (%)                                                                     |              | 1242 | 6.9%                   | 5.3%  | 8.1%  | 0.297                            | 0.577                            |
| Stage of primary tumor (%)                                                                              | T0 (in situ) | 1216 | 6.8%                   | 9.2%  | 13.4% | 0.344                            | 0.399                            |
|                                                                                                         | T1           |      | 58.3%                  | 56.0% | 52.5% |                                  |                                  |
|                                                                                                         | T2           |      | 27.6%                  | 27.3% | 29.0% |                                  |                                  |
|                                                                                                         | T3 or T4     |      | 7.4%                   | 7.5%  | 5.1%  |                                  |                                  |
| Lymph nodes involved (stage N1, N2 or N3) (%)                                                           |              | 1103 | 39.5%                  | 42.4% | 41.3% | 0.698                            | 0.412                            |
| Clinical UICC stage (%)                                                                                 | 1            | 1069 | 45.9%                  | 43.1% | 44.8% | 0.740                            | 0.769                            |
|                                                                                                         | 2            |      | 46.8%                  | 48.7% | 49.7% |                                  |                                  |
|                                                                                                         | 3            |      | 7.3%                   | 8.2%  | 5.5%  |                                  |                                  |
| Bloom-Richardson grade (%)                                                                              | 1            | 947  | 17.7%                  | 18.8% | 18.1% | 0.970                            | 0.808                            |
|                                                                                                         | 2            |      | 42.8%                  | 40.7% | 40.0% |                                  |                                  |
|                                                                                                         | 3            |      | 39.6%                  | 40.5% | 41.9% |                                  |                                  |
| Progesterone receptor positive (%)                                                                      |              | 673  | 61.8%                  | 58.6% | 47.7% | 0.048                            | 0.158                            |
| Estrogen receptor positive (%)                                                                          |              | 818  | 72.4%                  | 72.2% | 68.6% | 0.689                            | 0.748                            |
| Family history positive for breast cancer (%)                                                           |              | 1229 | 43.1%                  | 36.5% | 43.6% | 0.052                            | 0.112                            |
| Family history positive for breast and/or ovarian cancer (%)                                            |              | 1229 | 45.5%                  | 38.4% | 44.5% | 0.055                            | 0.069                            |
| Number of relatives with breast cancer divided by total number of female relatives (average)            |              | 1229 | 0.064                  | 0.065 | 0.078 | 0.270                            | 0.457                            |
| Number of relatives with breast or ovarian cancer divided by total number of female relatives (average) |              | 1229 | 0.071                  | 0.070 | 0.081 | 0.471                            | 0.808                            |
| Number of first degree relatives with breast cancer (average)                                           |              | 1229 | 0.23                   | 0.24  | 0.32  | 0.106                            | 0.326                            |
| Ever pregnant (%)                                                                                       |              | 1157 | 80.6%                  | 81.9% | 84.9% | 0.449                            | 0.415                            |
| Age at first pregnancy (average)                                                                        |              | 941  | 25.48                  | 24.82 | 25.15 | 0.147                            | 0.092                            |
| Total duration of pregnancies (average, in months)                                                      |              | 1192 | 14.64                  | 15.21 | 15.10 | 0.813                            | 0.525                            |
| Breast feeding (%)                                                                                      |              | 1192 | 52.2%                  | 59.2% | 59.5% | 0.074                            | 0.023                            |
| Total duration of breast feeding (average, in months)                                                   |              | 1192 | 4.78                   | 5.63  | 4.93  | 0.370                            | 0.273                            |
| Died during follow-up (%)                                                                               |              | 488  | 17.5%                  | 17.6% | 15.0% | 0.836                            | 0.858                            |

SNP: rs8051542 near TNRC9

| Patient or disease characteristics                                                                      |              | n=   | Phenotype per genotype |       |       | p-value<br>3 groups <sup>1</sup> | p-value<br>2 groups <sup>2</sup> |
|---------------------------------------------------------------------------------------------------------|--------------|------|------------------------|-------|-------|----------------------------------|----------------------------------|
|                                                                                                         |              |      | wt/wt                  | wt/mt | mt/mt |                                  |                                  |
| Genotype (number of patients)                                                                           |              |      | 331                    | 601   | 264   |                                  |                                  |
| Age at diagnosis (average)                                                                              |              | 1094 | 53.37                  | 53.55 | 55.27 | 0.093                            | 0.340                            |
| Age groups at diagnosis (%)                                                                             | <40 years    | 1094 | 10.4%                  | 12.7% | 7.9%  | 0.464                            | 0.827                            |
|                                                                                                         | 40-50 years  |      | 25.2%                  | 25.9% | 24.4% |                                  |                                  |
|                                                                                                         | 50-60 years  |      | 36.6%                  | 32.5% | 36.4% |                                  |                                  |
|                                                                                                         | >60 years    |      | 27.9%                  | 28.9% | 31.4% |                                  |                                  |
| BMI (average)                                                                                           |              | 1055 | 25.54                  | 25.19 | 25.42 | 0.522                            | 0.355                            |
| Bilateral breast cancer present (%)                                                                     |              | 1105 | 6.9%                   | 6.1%  | 6.5%  | 0.892                            | 0.674                            |
| Stage of primary tumor (%)                                                                              | T0 (in situ) | 1082 | 8.1%                   | 8.8%  | 11.6% | 0.446                            | 0.557                            |
|                                                                                                         | T1           |      | 57.6%                  | 56.0% | 53.9% |                                  |                                  |
|                                                                                                         | T2           |      | 28.3%                  | 26.7% | 29.5% |                                  |                                  |
|                                                                                                         | T3 or T4     |      | 6.1%                   | 8.5%  | 5.0%  |                                  |                                  |
| Lymph nodes involved (stage N1, N2 or N3) (%)                                                           |              | 983  | 43.7%                  | 40.9% | 40.1% | 0.676                            | 0.390                            |
| Clinical UICC stage (%)                                                                                 | 1            | 951  | 42.7%                  | 44.3% | 45.7% | 0.173                            | 0.114                            |
|                                                                                                         | 2            |      | 52.3%                  | 46.4% | 48.1% |                                  |                                  |
|                                                                                                         | 3            |      | 5.0%                   | 9.4%  | 6.3%  |                                  |                                  |
| Bloom-Richardson grade (%)                                                                              | 1            | 846  | 15.5%                  | 18.0% | 19.8% | 0.310                            | 0.567                            |
|                                                                                                         | 2            |      | 44.0%                  | 44.0% | 35.8% |                                  |                                  |
|                                                                                                         | 3            |      | 40.5%                  | 37.9% | 44.4% |                                  |                                  |
| Progesterone receptor positive (%)                                                                      |              | 618  | 62.2%                  | 58.1% | 55.3% | 0.459                            | 0.260                            |
| Estrogen receptor positive (%)                                                                          |              | 736  | 70.0%                  | 76.5% | 66.9% | 0.051                            | 0.301                            |
| Family history positive for breast cancer (%)                                                           |              | 1092 | 40.4%                  | 41.5% | 39.5% | 0.863                            | 0.887                            |
| Family history positive for breast and/or ovarian cancer (%)                                            |              | 1092 | 43.1%                  | 43.5% | 41.2% | 0.826                            | 0.922                            |
| Number of relatives with breast cancer divided by total number of female relatives (average)            |              | 1092 | 0.069                  | 0.072 | 0.062 | 0.480                            | 0.985                            |
| Number of relatives with breast or ovarian cancer divided by total number of female relatives (average) |              | 1092 | 0.076                  | 0.077 | 0.066 | 0.400                            | 0.743                            |
| Number of first degree relatives with breast cancer (average)                                           |              | 1092 | 0.26                   | 0.27  | 0.23  | 0.688                            | 0.977                            |
| Ever pregnant (%)                                                                                       |              | 1027 | 82.1%                  | 83.4% | 81.7% | 0.832                            | 0.785                            |
| Age at first pregnancy (average)                                                                        |              | 841  | 24.90                  | 25.09 | 25.24 | 0.749                            | 0.505                            |
| Total duration of pregnancies (average, in months)                                                      |              | 1056 | 15.74                  | 14.99 | 14.65 | 0.620                            | 0.356                            |
| Breast feeding (%)                                                                                      |              | 1056 | 55.4%                  | 58.9% | 57.3% | 0.613                            | 0.372                            |
| Total duration of breast feeding (average, in months)                                                   |              | 1056 | 4.87                   | 5.35  | 6.04  | 0.428                            | 0.327                            |
| Died during follow-up (%)                                                                               |              | 464  | 12.6%                  | 16.8% | 18.0% | 0.465                            | 0.228                            |

SNP: rs889312 near MAP3K1

| Patient or disease characteristics                                                                      |              | n=   | Phenotype per genotype |       |       | p-value<br>3 groups <sup>1</sup> | p-value<br>2 groups <sup>2</sup> |
|---------------------------------------------------------------------------------------------------------|--------------|------|------------------------|-------|-------|----------------------------------|----------------------------------|
|                                                                                                         |              |      | wt/wt                  | wt/mt | mt/mt |                                  |                                  |
| Genotype (number of patients)                                                                           |              |      | 624                    | 581   | 131   |                                  |                                  |
| Age at diagnosis (average)                                                                              |              | 1232 | 53.95                  | 53.66 | 52.93 | 0.656                            | 0.512                            |
| Age groups at diagnosis (%)                                                                             | <40 years    | 1232 | 11.1%                  | 11.2% | 11.6% | 0.861                            | 0.994                            |
|                                                                                                         | 40-50 years  |      | 26.3%                  | 25.0% | 31.4% |                                  |                                  |
|                                                                                                         | 50-60 years  |      | 33.9%                  | 34.8% | 33.1% |                                  |                                  |
|                                                                                                         | >60 years    |      | 28.7%                  | 29.0% | 24.0% |                                  |                                  |
| BMI (average)                                                                                           |              | 1186 | 25.23                  | 25.46 | 24.87 | 0.387                            | 0.640                            |
| Bilateral breast cancer present (%)                                                                     |              | 1243 | 6.9%                   | 5.5%  | 6.6%  | 0.615                            | 0.357                            |
| Stage of primary tumor (%)                                                                              | T0 (in situ) | 1217 | 9.0%                   | 10.1% | 9.2%  | 0.447                            | 0.176                            |
|                                                                                                         | T1           |      | 53.8%                  | 56.3% | 62.2% |                                  |                                  |
|                                                                                                         | T2           |      | 30.1%                  | 26.5% | 22.7% |                                  |                                  |
|                                                                                                         | T3 or T4     |      | 7.1%                   | 7.1%  | 5.9%  |                                  |                                  |
| Lymph nodes involved (stage N1, N2 or N3) (%)                                                           |              | 1102 | 45.0%                  | 39.5% | 35.8% | 0.090                            | 0.044                            |
| Clinical UICC stage (%)                                                                                 | 1            | 1066 | 42.2%                  | 44.0% | 50.5% | 0.641                            | 0.591                            |
|                                                                                                         | 2            |      | 49.8%                  | 48.8% | 42.9% |                                  |                                  |
|                                                                                                         | 3            |      | 8.0%                   | 7.2%  | 6.7%  |                                  |                                  |
| Bloom-Richardson grade (%)                                                                              | 1            | 947  | 18.8%                  | 16.0% | 23.9% | 0.256                            | 0.353                            |
|                                                                                                         | 2            |      | 38.9%                  | 44.5% | 39.1% |                                  |                                  |
|                                                                                                         | 3            |      | 42.3%                  | 39.5% | 37.0% |                                  |                                  |
| Progesterone receptor positive (%)                                                                      |              | 672  | 56.2%                  | 57.9% | 64.1% | 0.516                            | 0.481                            |
| Estrogen receptor positive (%)                                                                          |              | 818  | 68.3%                  | 75.1% | 70.7% | 0.119                            | 0.056                            |
| Family history positive for breast cancer (%)                                                           |              | 1230 | 38.9%                  | 41.0% | 42.5% | 0.663                            | 0.393                            |
| Family history positive for breast and/or ovarian cancer (%)                                            |              | 1230 | 40.8%                  | 42.9% | 45.0% | 0.627                            | 0.387                            |
| Number of relatives with breast cancer divided by total number of female relatives (average)            |              | 1230 | 0.068                  | 0.066 | 0.071 | 0.874                            | 0.832                            |
| Number of relatives with breast or ovarian cancer divided by total number of female relatives (average) |              | 1230 | 0.075                  | 0.070 | 0.080 | 0.659                            | 0.713                            |
| Number of first degree relatives with breast cancer (average)                                           |              | 1230 | 0.26                   | 0.24  | 0.25  | 0.909                            | 0.676                            |
| Ever pregnant (%)                                                                                       |              | 1156 | 82.0%                  | 81.8% | 85.7% | 0.602                            | 0.841                            |
| Age at first pregnancy (average)                                                                        |              | 943  | 24.78                  | 25.40 | 24.85 | 0.115                            | 0.075                            |
| Total duration of pregnancies (average, in months)                                                      |              | 1192 | 15.27                  | 14.45 | 16.23 | 0.353                            | 0.522                            |
| Breast feeding (%)                                                                                      |              | 1192 | 55.6%                  | 57.2% | 60.3% | 0.627                            | 0.455                            |
| Total duration of breast feeding (average, in months)                                                   |              | 1192 | 5.20                   | 5.29  | 5.14  | 0.984                            | 0.911                            |
| Died during follow-up (%)                                                                               |              | 492  | 17.1%                  | 18.1% | 13.0% | 0.670                            | 0.991                            |

SNP: rs13281615 on 8q24

| Patient or disease characteristics                                                                      |              | n=   | Phenotype per genotype |       |       | p-value<br>3 groups <sup>1</sup> | p-value<br>2 groups <sup>2</sup> |
|---------------------------------------------------------------------------------------------------------|--------------|------|------------------------|-------|-------|----------------------------------|----------------------------------|
|                                                                                                         |              |      | wt/wt                  | wt/mt | mt/mt |                                  |                                  |
| Genotype (number of patients)                                                                           |              |      | 440                    | 692   | 213   |                                  |                                  |
| Age at diagnosis (average)                                                                              |              | 1241 | 54.01                  | 53.56 | 54.00 | 0.784                            | 0.612                            |
| Age groups at diagnosis (%)                                                                             | <40 years    | 1240 | 10.9%                  | 11.3% | 10.9% | 0.926                            | 0.866                            |
|                                                                                                         | 40-50 years  |      | 24.6%                  | 27.5% | 23.8% |                                  |                                  |
|                                                                                                         | 50-60 years  |      | 35.0%                  | 33.5% | 35.8% |                                  |                                  |
|                                                                                                         | >60 years    |      | 29.4%                  | 27.7% | 29.5% |                                  |                                  |
| BMI (average)                                                                                           |              | 1194 | 25.27                  | 25.15 | 25.77 | 0.248                            | 0.953                            |
| Bilateral breast cancer present (%)                                                                     |              | 1252 | 6.6%                   | 6.5%  | 4.6%  | 0.578                            | 0.717                            |
| Stage of primary tumor (%)                                                                              | T0 (in situ) | 1227 | 9.5%                   | 9.7%  | 9.3%  | 0.272                            | 0.498                            |
|                                                                                                         | T1           |      | 54.9%                  | 54.9% | 61.9% |                                  |                                  |
|                                                                                                         | T2           |      | 27.4%                  | 29.4% | 22.2% |                                  |                                  |
|                                                                                                         | T3 or T4     |      | 8.2%                   | 6.0%  | 6.7%  |                                  |                                  |
| Lymph nodes involved (stage N1, N2 or N3) (%)                                                           |              | 1111 | 42.8%                  | 43.6% | 32.4% | 0.030                            | 0.570                            |
| Clinical UICC stage (%)                                                                                 | 1            | 1076 | 42.3%                  | 42.5% | 53.3% | 0.041                            | 0.188                            |
|                                                                                                         | 2            |      | 48.3%                  | 51.2% | 40.1% |                                  |                                  |
|                                                                                                         | 3            |      | 9.4%                   | 6.3%  | 6.6%  |                                  |                                  |
| Bloom-Richardson grade (%)                                                                              | 1            | 955  | 16.4%                  | 18.2% | 22.1% | 0.674                            | 0.598                            |
|                                                                                                         | 2            |      | 42.1%                  | 41.6% | 38.3% |                                  |                                  |
|                                                                                                         | 3            |      | 41.5%                  | 40.2% | 39.6% |                                  |                                  |
| Progesterone receptor positive (%)                                                                      |              | 674  | 54.1%                  | 59.1% | 63.2% | 0.271                            | 0.145                            |
| Estrogen receptor positive (%)                                                                          |              | 822  | 68.3%                  | 72.5% | 78.3% | 0.130                            | 0.106                            |
| Family history positive for breast cancer (%)                                                           |              | 1239 | 39.3%                  | 40.0% | 41.2% | 0.903                            | 0.748                            |
| Family history positive for breast and/or ovarian cancer (%)                                            |              | 1239 | 41.8%                  | 42.0% | 41.8% | 0.996                            | 0.952                            |
| Number of relatives with breast cancer divided by total number of female relatives (average)            |              | 1239 | 0.064                  | 0.067 | 0.073 | 0.632                            | 0.512                            |
| Number of relatives with breast or ovarian cancer divided by total number of female relatives (average) |              | 1239 | 0.071                  | 0.074 | 0.075 | 0.872                            | 0.628                            |
| Number of first degree relatives with breast cancer (average)                                           |              | 1239 | 0.23                   | 0.26  | 0.25  | 0.605                            | 0.348                            |
| Ever pregnant (%)                                                                                       |              | 1165 | 81.3%                  | 81.9% | 84.4% | 0.644                            | 0.613                            |
| Age at first pregnancy (average)                                                                        |              | 948  | 25.33                  | 24.74 | 25.47 | 0.091                            | 0.182                            |
| Total duration of pregnancies (average, in months)                                                      |              | 1201 | 14.34                  | 15.62 | 14.34 | 0.258                            | 0.234                            |
| Breast feeding (%)                                                                                      |              | 1201 | 57.9%                  | 56.5% | 55.9% | 0.864                            | 0.600                            |
| Total duration of breast feeding (average, in months)                                                   |              | 1201 | 5.41                   | 5.22  | 4.92  | 0.853                            | 0.666                            |
| Died during follow-up (%)                                                                               |              | 490  | 19.3%                  | 17.3% | 10.8% | 0.280                            | 0.340                            |

**SNP: rs3817198 in LSP1**

| Patient or disease characteristics                                                                      |              | n=   | Phenotype per genotype |       |       | p-value<br>3 groups <sup>1</sup> | p-value<br>2 groups <sup>2</sup> |
|---------------------------------------------------------------------------------------------------------|--------------|------|------------------------|-------|-------|----------------------------------|----------------------------------|
|                                                                                                         |              |      | wt/wt                  | wt/mt | mt/mt |                                  |                                  |
| Genotype (number of patients)                                                                           |              |      | 633                    | 574   | 126   |                                  |                                  |
| Age at diagnosis (average)                                                                              |              | 1232 | 53.62                  | 54.08 | 53.13 | 0.640                            | 0.652                            |
| Age groups at diagnosis (%)                                                                             | <40 years    | 1231 | 11.6%                  | 10.4% | 12.1% | 0.918                            | 0.846                            |
|                                                                                                         | 40-50 years  |      | 26.2%                  | 24.7% | 28.4% |                                  |                                  |
|                                                                                                         | 50-60 years  |      | 35.0%                  | 35.1% | 31.9% |                                  |                                  |
|                                                                                                         | >60 years    |      | 27.2%                  | 29.8% | 27.6% |                                  |                                  |
| BMI (average)                                                                                           |              | 1187 | 25.27                  | 25.33 | 24.98 | 0.750                            | 0.970                            |
| Bilateral breast cancer present (%)                                                                     |              | 1243 | 5.9%                   | 5.8%  | 10.2% | 0.194                            | 0.615                            |
| Stage of primary tumor (%)                                                                              | T0 (in situ) | 1219 | 10.0%                  | 9.2%  | 8.5%  | 0.534                            | 0.214                            |
|                                                                                                         | T1           |      | 56.4%                  | 55.7% | 55.1% |                                  |                                  |
|                                                                                                         | T2           |      | 27.4%                  | 27.1% | 29.7% |                                  |                                  |
|                                                                                                         | T3 or T4     |      | 6.2%                   | 8.1%  | 6.8%  |                                  |                                  |
| Lymph nodes involved (stage N1, N2 or N3) (%)                                                           |              | 1102 | 38.7%                  | 44.0% | 44.4% | 0.190                            | 0.078                            |
| Clinical UICC stage (%)                                                                                 | 1            | 1068 | 44.4%                  | 45.2% | 39.6% | 0.557                            | 0.489                            |
|                                                                                                         | 2            |      | 49.0%                  | 46.1% | 52.8% |                                  |                                  |
|                                                                                                         | 3            |      | 6.6%                   | 8.7%  | 7.5%  |                                  |                                  |
| Bloom-Richardson grade (%)                                                                              | 1            | 948  | 19.1%                  | 17.4% | 16.5% | 0.917                            | 0.724                            |
|                                                                                                         | 2            |      | 41.0%                  | 40.3% | 43.5% |                                  |                                  |
|                                                                                                         | 3            |      | 39.9%                  | 42.3% | 40.0% |                                  |                                  |
| Progesterone receptor positive (%)                                                                      |              | 672  | 60.8%                  | 55.7% | 54.5% | 0.375                            | 0.164                            |
| Estrogen receptor positive (%)                                                                          |              | 817  | 71.9%                  | 72.0% | 68.4% | 0.812                            | 0.870                            |
| Family history positive for breast cancer (%)                                                           |              | 1230 | 38.0%                  | 41.5% | 43.1% | 0.382                            | 0.177                            |
| Family history positive for breast and/or ovarian cancer (%)                                            |              | 1230 | 39.7%                  | 43.8% | 44.8% | 0.312                            | 0.130                            |
| Number of relatives with breast cancer divided by total number of female relatives (average)            |              | 1230 | 0.063                  | 0.072 | 0.067 | 0.416                            | 0.215                            |
| Number of relatives with breast or ovarian cancer divided by total number of female relatives (average) |              | 1230 | 0.068                  | 0.078 | 0.075 | 0.351                            | 0.153                            |
| Number of first degree relatives with breast cancer (average)                                           |              | 1230 | 0.23                   | 0.28  | 0.22  | 0.298                            | 0.276                            |
| Ever pregnant (%)                                                                                       |              | 1156 | 81.7%                  | 80.3% | 89.3% | 0.090                            | 0.901                            |
| Age at first pregnancy (average)                                                                        |              | 938  | 24.80                  | 25.22 | 25.62 | 0.176                            | 0.090                            |
| Total duration of pregnancies (average, in months)                                                      |              | 1192 | 15.32                  | 14.26 | 16.63 | 0.166                            | 0.419                            |
| Breast feeding (%)                                                                                      |              | 1192 | 58.8%                  | 54.9% | 56.5% | 0.428                            | 0.207                            |
| Total duration of breast feeding (average, in months)                                                   |              | 1192 | 5.43                   | 5.07  | 5.01  | 0.809                            | 0.517                            |
| Died during follow-up (%)                                                                               |              | 485  | 15.0%                  | 19.4% | 18.2% | 0.466                            | 0.222                            |

**In this supplemental table, the associations of SNP genotypes with disease and patients characteristics are explored in the ORIGO cohort. The following information is given for each patient characteristic: the total number of patients for whom this characteristic was known, the distribution or average of this characteristic or phenotype per genotype, and the p-values comparing the three genotype groups separately or in a co-dominant model.**

**Abbreviations: SNP, single nucleotide polymorphism; wt/wt, homozygotes for the wildtype allele; wt/mt, heterozygotes; mt/mt, homozygotes for the minor allele.**

**<sup>1</sup> p-value comparing the three genotype groups separately**

**<sup>2</sup> p-value in a co-dominant model, comparing the group of homozygotes for the wildtype allele with the combined group of heterozygotes and homozygotes for the minor allele**
